# Supplementary material for: Experimental determination of the steady-state charging probabilities and particle size conservation in non-radioactive and radioactive bipolar aerosol chargers in the size range of 5–40 nm
Source: PubMed Central journal article supplement (PMC4385563; doi:10.1007/s11051-015-2981-x), 2015-04-05
Supplement: 11051_2015_2981_MOESM1_ESM.pdf [file 11051_2015_2981_MOESM1_ESM.pdf]

Supplemental Information:

Experimental determination of the steady-state  
charging probabilities and particle size conservation in  
non-radioactive and radioactive bipolar aerosol  
chargers in the size range of 5 – 40 nm

Peter Kallinger\* and Wladyslaw W. Szymanski

Faculty of Physics, University of Vienna, Boltzmanngasse 5, 1090 Vienna, Austria

\*Corresponding author:  
Email: peter.kallinger@univie.ac.at  
Tel.: +43-1-4277-73402

Table S1: Measured charging probabilities of the Electrical Ionizer with correction for particle losses. Please note that the charge equilibrium was not achieved in every measurement

| Charge | Diameter [nm] | Flow [lpm] | Charging probability | Standard deviation |
|--------|---------------|------------|----------------------|--------------------|
| -1     | 5             | 0.6        | 0.0203               | 0.0013             |
| -1     | 5             | 0.6        | 0.0195               | 0.0015             |
| -1     | 5             | 1.5        | 0.0485               | 0.0027             |
| -1     | 5             | 1.5        | 0.0571               | 0.0020             |
| -1     | 5             | 5.0        | 0.1485               | 0.0118             |
| -1     | 10            | 0.6        | 0.0443               | 0.0018             |
| -1     | 10            | 1.5        | 0.0713               | 0.0030             |
| -1     | 10            | 5.0        | 0.1752               | 0.0033             |
| -1     | 20            | 0.6        | 0.0970               | 0.0062             |
| -1     | 20            | 1.5        | 0.1106               | 0.0014             |
| -1     | 20            | 5.0        | 0.1533               | 0.0024             |
| -1     | 40            | 0.6        | 0.1805               | 0.0185             |
| -1     | 40            | 1.5        | 0.1864               | 0.0051             |
| -1     | 40            | 5.0        | 0.2027               | 0.0045             |
| -2     | 40            | 0.6        | 0.0051               | 0.0005             |
| -2     | 40            | 1.5        | 0.0053               | 0.0001             |
| -2     | 40            | 5.0        | 0.0066               | 0.0003             |
| +1     | 5             | 0.6        | 0.0166               | 0.0011             |
| +1     | 5             | 0.6        | 0.0176               | 0.0006             |
| +1     | 5             | 1.5        | 0.0388               | 0.0019             |
| +1     | 5             | 5.0        | 0.1624               | 0.0138             |
| +1     | 10            | 0.6        | 0.0399               | 0.0014             |
| +1     | 10            | 1.5        | 0.0755               | 0.0016             |
| +1     | 10            | 5.0        | 0.1745               | 0.0035             |
| +1     | 20            | 0.6        | 0.0951               | 0.0021             |
| +1     | 20            | 0.6        | 0.0953               | 0.0032             |
| +1     | 20            | 1.5        | 0.1199               | 0.0041             |
| +1     | 20            | 5.0        | 0.1587               | 0.0034             |
| +1     | 40            | 0.6        | 0.1890               | 0.0060             |
| +1     | 40            | 1.5        | 0.2039               | 0.0069             |
| +1     | 40            | 5.0        | 0.2274               | 0.0035             |
| +2     | 40            | 0.6        | 0.0053               | 0.0003             |
| +2     | 40            | 1.5        | 0.0064               | 0.0003             |
| +2     | 40            | 5.0        | 0.0097               | 0.0005             |

Table S2: Measured charging probabilities of the Advanced Aerosol Neutralizer

| Charge | Diameter [nm] | Flow [lpm] | Charging probability | Standard deviation |
|--------|---------------|------------|----------------------|--------------------|
| -1     | 5             | 0.6        | 0.0201               | 0.0010             |
| -1     | 5             | 0.6        | 0.0199               | 0.0011             |
| -1     | 5             | 0.6        | 0.0192               | 0.0008             |
| -1     | 5             | 1.5        | 0.0227               | 0.0013             |
| -1     | 5             | 1.5        | 0.0205               | 0.0004             |
| -1     | 5             | 1.5        | 0.0204               | 0.0012             |
| -1     | 5             | 1.5        | 0.0196               | 0.0006             |
| -1     | 5             | 5.0        | 0.0244               | 0.0012             |
| -1     | 5             | 5.0        | 0.0224               | 0.0007             |
| -1     | 10            | 0.6        | 0.0553               | 0.0010             |
| -1     | 10            | 1.5        | 0.0524               | 0.0025             |
| -1     | 10            | 5.0        | 0.0517               | 0.0018             |
| -1     | 20            | 0.6        | 0.1197               | 0.0042             |
| -1     | 20            | 1.5        | 0.1231               | 0.0020             |
| -1     | 20            | 5.0        | 0.1228               | 0.0042             |
| -1     | 40            | 0.6        | 0.2170               | 0.0072             |
| -1     | 40            | 1.5        | 0.2162               | 0.0086             |
| -1     | 40            | 5.0        | 0.2168               | 0.0044             |
| -2     | 40            | 0.6        | 0.0066               | 0.0003             |
| -2     | 40            | 1.5        | 0.0062               | 0.0003             |
| -2     | 40            | 5.0        | 0.0064               | 0.0003             |
| +1     | 5             | 0.6        | 0.0130               | 0.0008             |
| +1     | 5             | 1.5        | 0.0111               | 0.0009             |
| +1     | 5             | 5.0        | 0.0119               | 0.0007             |
| +1     | 10            | 0.6        | 0.0328               | 0.0010             |
| +1     | 10            | 0.6        | 0.0347               | 0.0007             |
| +1     | 10            | 1.5        | 0.0321               | 0.0011             |
| +1     | 10            | 5.0        | 0.0315               | 0.0010             |
| +1     | 20            | 0.6        | 0.0777               | 0.0050             |
| +1     | 20            | 0.6        | 0.0906               | 0.0026             |
| +1     | 20            | 1.5        | 0.0795               | 0.0019             |
| +1     | 20            | 5.0        | 0.0788               | 0.0013             |
| +1     | 40            | 0.6        | 0.1517               | 0.0022             |
| +1     | 40            | 1.5        | 0.1501               | 0.0016             |
| +1     | 40            | 5.0        | 0.1556               | 0.0023             |
| +2     | 40            | 0.6        | 0.0034               | 0.0001             |
| +2     | 40            | 1.5        | 0.0033               | 0.0001             |
| +2     | 40            | 5.0        | 0.0035               | 0.0001             |

Table S3: Measured charging probabilities of the  $^{241}\text{Am}$ -charger

| Charge | Diameter [nm] | Flow [lpm] | Charging probability | Standard deviation |
|--------|---------------|------------|----------------------|--------------------|
| -1     | 5             | 0.6        | 0.0189               | 0.0006             |
| -1     | 5             | 1.5        | 0.0327               | 0.0008             |
| -1     | 5             | 5.0        | 0.0315               | 0.0016             |
| -1     | 10            | 0.6        | 0.0490               | 0.0014             |
| -1     | 10            | 1.5        | 0.0567               | 0.0017             |
| -1     | 10            | 5.0        | 0.0581               | 0.0038             |
| -1     | 20            | 0.6        | 0.1130               | 0.0026             |
| -1     | 20            | 1.5        | 0.1171               | 0.0070             |
| -1     | 20            | 5.0        | 0.1140               | 0.0023             |
| -1     | 40            | 0.6        | 0.1999               | 0.0042             |
| -1     | 40            | 1.5        | 0.2019               | 0.0032             |
| -1     | 40            | 5.0        | 0.2020               | 0.0078             |
| -2     | 40            | 0.6        | 0.0053               | 0.0001             |
| -2     | 40            | 1.5        | 0.0052               | 0.0001             |
| -2     | 40            | 5.0        | 0.0055               | 0.0004             |
| +1     | 5             | 0.6        | 0.0116               | 0.0011             |
| +1     | 5             | 1.5        | 0.0205               | 0.0006             |
| +1     | 5             | 5.0        | 0.0203               | 0.0018             |
| +1     | 10            | 0.6        | 0.0330               | 0.0009             |
| +1     | 10            | 1.5        | 0.0378               | 0.0015             |
| +1     | 10            | 5.0        | 0.0386               | 0.0008             |
| +1     | 20            | 0.6        | 0.0862               | 0.0012             |
| +1     | 20            | 1.5        | 0.0907               | 0.0013             |
| +1     | 20            | 5.0        | 0.0866               | 0.0021             |
| +1     | 40            | 0.6        | 0.1503               | 0.0268             |
| +1     | 40            | 1.5        | 0.1581               | 0.0014             |
| +1     | 40            | 5.0        | 0.1589               | 0.0020             |
| +2     | 40            | 0.6        | 0.0034               | 0.0005             |
| +2     | 40            | 1.5        | 0.0035               | 0.0001             |
| +2     | 40            | 5.0        | 0.0033               | 0.0001             |

Table S4: Additional measurements done with the  $^{241}\text{Am}$ -charger to investigate the discrepancies at different flow rates

| Charged | Diameter [nm] | Flow [lpm] | Charging probability | Standard deviation | Comment               |
|---------|---------------|------------|----------------------|--------------------|-----------------------|
| -1      | 5             | 0.6        | 0.0201               | 0.0006             | without $\text{CO}_2$ |
| -1      | 5             | 0.6        | 0.0189               | 0.0011             | indirect measurement  |
| -1      | 5             | 0.8        | 0.0220               | 0.0008             |                       |
| -1      | 5             | 1.1        | 0.0249               | 0.0007             |                       |
| -1      | 5             | 1.5        | 0.0248               | 0.0015             | indirect measurement  |
| -1      | 5             | 3.0        | 0.0343               | 0.0007             |                       |
